# Supplementary material for: Large Wood Debris Contributes to Beach Ecosystems but Colombian Beachgoer’s Do Not Recognize It
Source: MDPI journal article supplement (doi:10.3390/su14138140), 2022-07-04
Supplement: s1 [file s1]

Table S1. Variables considered for analyzing the willingness to pay for having the LWD cleared.

| #                                                                                        | Variable                                  | Description                                                                                                                                                                                                                                                               |
|------------------------------------------------------------------------------------------|-------------------------------------------|---------------------------------------------------------------------------------------------------------------------------------------------------------------------------------------------------------------------------------------------------------------------------|
| <b>Section a) Respondents' socioeconomic information and perceptions about the beach</b> |                                           |                                                                                                                                                                                                                                                                           |
| 1                                                                                        | Gender                                    | Dichotomic variable: (male), (female)                                                                                                                                                                                                                                     |
| 2                                                                                        | Age                                       | Continuous variable                                                                                                                                                                                                                                                       |
| 3                                                                                        | Incomes                                   | Ordinal variable (< 1 MCLW; 2-3 MCLW; 3-4 MCLW; > 4 MCLW)                                                                                                                                                                                                                 |
| 4                                                                                        | Beach state                               | Ordinal variable (Very good; Good; Bad; Very bad)                                                                                                                                                                                                                         |
| 6                                                                                        | Safety in the beach                       | Ordinal variable (Very secure; Secure; Middle; Little secure; Unsecure at all)                                                                                                                                                                                            |
| 7                                                                                        | Visit frequency                           | Ordinal variable (Almost never; Very few times; Sometimes; Often; Frequently)                                                                                                                                                                                             |
| 8                                                                                        | Importance beach cleanness                | Likert scale 1-5                                                                                                                                                                                                                                                          |
| 9                                                                                        | Ecosystem services list (general)         | Tranquility (1–5 Likert scale); Weather (1–5 Likert scale); Scenic beauty (1–5 Likert scale); Seafood (1–5 Likert scale); Clean water (1–5 Likert scale); Sand (erosion control) (1–5 Likert scale); Inspiration (1–5 Likert scale); Cultural identity (1–5 Likert scale) |
| 10                                                                                       | LWD provide ecological benefits           | Dichotomic variable: (yes), (no)                                                                                                                                                                                                                                          |
|                                                                                          | LWD provides stability to the sandy beach | Dichotomic variable: (yes), (no)                                                                                                                                                                                                                                          |
| <b>Section b) Beachgoers' perceptions on driftwood</b>                                   |                                           |                                                                                                                                                                                                                                                                           |
| 10                                                                                       | Awareness on the driftwood                | Dichotomic variable: (yes), (no)                                                                                                                                                                                                                                          |
| 11                                                                                       | Image of driftwood                        | Categorical variable: (positive), (negative), (neutral)                                                                                                                                                                                                                   |
| 12                                                                                       | LWD benefit people                        | Dichotomic variable: (yes), (no)                                                                                                                                                                                                                                          |
| 13                                                                                       | Driftwood uses                            | Dichotomic variable: (yes), (no)                                                                                                                                                                                                                                          |
| 14                                                                                       | LWD perception                            | Categorical variable (debris/garbage/pollution) (natural process) (benefit to the beach)                                                                                                                                                                                  |
| 15                                                                                       | Remove woody debris                       | Dichotomic variable: (yes), (no)                                                                                                                                                                                                                                          |
| <b>Section c) Willingness to pay for LWD removal</b>                                     |                                           |                                                                                                                                                                                                                                                                           |
| 16                                                                                       | Willingness to pay for LWD removal        | Dichotomic variable: (yes), (no)                                                                                                                                                                                                                                          |
| 17                                                                                       | Value to pay per visit (Open ended)       | Continuous variable                                                                                                                                                                                                                                                       |
